# Supplementary material
Source: publisher figshare collection journal article supplement (https://gsajournals.figshare.com/ndownloader/files/15342602)
Supplement: Supplementary file 1 [file 15342602]

## Sheet: Tab_S1
		Table S1: Complete CH analysis in parental (Cs, Di/w, Z30), reciprocal F1 and IsoP-F34 flies.
			MALES
	Full name	Abbreviation	Cs			Di/W			Z30			Cs x Z30			Z30 x Cs			1W14			3W1
	(Z)-11-Vaccenyl acetate	cVA	41.7715	±	9.83214	54.878	±	10.9359	113.855	±	12.3841	80.3578	±	19.6919	158.801	±	18.4776	91.6737	±	15.7511	93.9407	±	15.6024
	2-Methyldocosane	23-Br	11.5679	±	0.561367	7.5336	±	0.356486	0.967247	±	0.0535962	6.64314	±	0.776855	6.76395	±	0.484379	1.61879	±	0.0989643	1.32061	±	0.117209
	(Z)-9-Tricosene	9T	46.5864	±	2.39727	30.1358	±	1.42625	23.2015	±	1.28508	28.9838	±	1.62896	27.0648	±	1.93724	30.7888	±	1.88877	25.091	±	2.24114
	(Z)-7-Tricosene	7T	753.914	±	24.7764	674.067	±	18.6956	375.162	±	8.14385	547.238	±	17.0546	632.819	±	28.8244	486.47	±	14.7914	436.208	±	25.6464
	(Z)-5-Tricosene	5T	75.6361	±	2.75006	70.2261	±	2.24071	302.655	±	5.63792	278.32	±	16.4442	234.441	±	8.16407	256.508	±	10.0415	309.575	±	13.2553
	n-Tricosane	n-C23	165.512	±	5.98013	253.948	±	4.84583	93.867	±	3.07394	148.312	±	4.85576	146.204	±	5.22528	102.248	±	2.99429	116.13	±	4.47593
	2-Methyltetracosane	25-Br	34.982	±	1.1613	41.5929	±	1.80144	64.078	±	2.53088	28.3946	±	2.04066	23.428	±	1.22282	52.4959	±	2.84651	58.4648	±	4.42881
	(Z)-9-Pentacosene	9P	66.4387	±	4.64361	97.0522	±	4.20345	84.9403	±	3.35488	66.2595	±	4.7608	54.6633	±	2.85137	64.1686	±	3.47824	76.8695	±	5.48154
	(Z)-7-Pentacosene	7P	277.45	±	15.2376	350.395	±	18.3024	195.36	±	10.3719	254.613	±	22.8391	207.402	±	15.5419	280.162	±	9.78202	317.022	±	22.2726
	(Z)-5-Pentacosene	5P	7.52027	±	0.750851	8.57519	±	1.00472	28.6859	±	1.20671	18.4892	±	2.49439	9.53971	±	1.58668	35.1929	±	1.72867	33.3466	±	1.86435
	n-Pentacosane	n-C25	24.1778	±	1.06134	86.5772	±	1.7403	41.5198	±	1.18162	34.0244	±	1.81224	31.4541	±	1.94677	34.343	±	2.17042	39.2834	±	1.28202
	2-Methylhexacosane	27-Br	142.236	±	4.51786	118.446	±	2.68351	183.652	±	4.99046	135.897	±	7.99229	184.609	±	8.06596	134.095	±	4.44525	175.663	±	9.96509
	(Z)-7-Heptacosene	7H	7.88677	±	0.861329	13.2158	±	1.00832	4.84004	±	0.234549	5.71843	±	0.890822	7.37271	±	0.855091	14.3816	±	1.11159	12.2656	±	0.570908
	n-Heptacosane	n-C27	13.6183	±	1.21422	33.8923	±	2.22544	15.6923	±	0.469442	22.8394	±	1.09797	25.0723	±	2.04384	27.6983	±	1.25476	21.7007	±	2.42011
	2-Methylheptacosane	28-Br	3.93789	±	0.314587	4.04809	±	0.212251	4.12415	±	0.245192	4.27931	±	0.457445	6.62137	±	0.552962	6.04504	±	0.678203	6.15581	±	0.363154
	n-octacosane	n-C28	6.42594	±	0.601554	3.4297	±	0.263629	4.56044	±	0.423699	7.72635	±	1.25501	10.6439	±	2.48836	5.04855	±	0.633193	5.44766	±	0.233694
	2-Methyloctacosane	29-Br	89.6483	±	4.29996	76.4366	±	5.28657	167.067	±	8.26499	116.895	±	3.18952	142.622	±	8.59831	118.349	±	5.19188	111.174	±	7.37922
	n-Nonacosane	n-C29	4.8458	±	0.456193	7.94681	±	0.588304	6.51463	±	0.650338	7.6434	±	0.564225	8.93581	±	0.941772	9.45524	±	0.676924	9.06645	±	0.737188
	2-Methyltriacontane	31-Br	9.51522	±	0.625444	15.1035	±	3.06859	53.577	±	2.70734	16.0974	±	1.14302	19.0694	±	2.20299	13.5674	±	0.859754	13.2631	±	0.572741
	Sum of all cuticular hydrocarbons	∑CHs	1741.9	±	48.7124	1892.62	±	38.6388	1650.46	±	26.8714	1728.37	±	63.7384	1778.73	±	29.2158	1672.64	±	28.5964	1768.05	±	75.246
	Sum of all desaturated CHs	∑Desat	1235.43	±	35.511	1243.67	±	27.7782	1014.85	±	18.6678	1199.62	±	49.3126	1173.3	±	24.4185	1167.67	±	23.4082	1210.38	±	64.1715
	Sum of all Branched CHs	∑Br	291.887	±	9.28009	263.16	±	7.2069	473.465	±	14.8967	308.206	±	11.0189	383.114	±	13.1743	326.172	±	10.9141	366.041	±	16.1995
	Sum of all Linear saturated CHs	∑Lin	214.58	±	7.56771	385.794	±	6.91468	162.154	±	4.11125	220.546	±	7.1858	222.31	±	7.55188	178.793	±	4.69965	191.628	±	6.55418
	7T/5T ratio (= T-ratio)	7T/5T	10.0223	±	0.186815	9.62482	±	0.181441	1.23977	±	0.015991	2.03487	±	0.146018	2.74803	±	0.188356	1.91613	±	0.074064	1.41375	±	0.0626089
			FEMALES
			Cs			Di/W			Z30			Cs x Z30			Z30 x Cs			1W14			3W1
	(Z,Z)-7,11-Tricosadiene	7,11TD	13.1349	±	0.762753	9.35112	±	0.657277	0	±	0	5.28313	±	0.194831	5.4968	±	0.334312	0	±	0	0	±	0
	2-Methyldocosane	23-Br	2.91396	±	0.279221	4.28249	±	0.249131	4.55358	±	0.376934	6.07672	±	0.354954	6.5877	±	0.420923	5.04337	±	0.485761	4.65353	±	0.267151
	(Z)-9-Tricosene	9T	5.79043	±	0.429626	9.99394	±	0.580953	3.29991	±	0.271635	4.40075	±	0.257452	4.77201	±	0.30557	4.12095	±	0.396702	3.80901	±	0.219108
	(Z)-7-Tricosene	7T	29.5712	±	2.73621	34.1897	±	3.58147	7.83085	±	0.415626	10.347	±	0.355491	10.1894	±	0.633375	7.40931	±	0.419748	7.33365	±	0.579955
	n-Tricosane	n-C23	67.549	±	2.35657	140.622	±	5.21103	31.4773	±	3.15854	90.432	±	3.04167	83.2505	±	3.42621	44.4356	±	1.71299	42.2677	±	2.71226
	(Z,Z)-7,11-Pentacosadiene	7,11-PD	55.413	±	4.72514	40.1799	±	1.49757	6.43682	±	0.449205	11.9414	±	0.868212	12.6395	±	0.374297	7.15605	±	0.450869	5.80961	±	0.343547
	(Z,Z)-5,9-Pentacosadiene	5,9-PD	11.3939	±	2.02111	22.5167	±	2.72999	198.126	±	7.65284	285.562	±	15.2074	342.185	±	21.7259	264.782	±	15.6284	222.582	±	9.9415
	2-Methyltetracosane	25-Br	37.7715	±	2.09751	56.8363	±	2.48076	29.6035	±	1.51996	41.5968	±	2.25819	45.2901	±	5.45894	19.2933	±	1.5202	16.1855	±	1.52587
	(Z)-9-Pentacosene	9P	55.3881	±	2.93359	111.936	±	3.92862	14.4702	±	0.621971	21.0065	±	1.10421	25.0389	±	1.58925	9.64698	±	0.760526	8.09172	±	0.761702
	(Z)-7-Pentacosene	7P	37.3759	±	4.57632	77.2974	±	3.84547	11.1124	±	1.81194	9.27853	±	0.405607	10.173	±	0.628714	9.33362	±	0.656125	9.61773	±	0.51561
	(Z)-5-Pentacosene	5P	5.28206	±	0.348173	10.2315	±	1.32716	28.435	±	2.04858	32.7006	±	1.92369	26.1734	±	2.00062	34.1286	±	1.74478	32.8415	±	2.11534
	n-Pentacosane	n-C25	70.8619	±	3.20438	189.313	±	10.5196	70.3707	±	3.2322	74.156	±	3.07882	71.6005	±	3.29105	59.4626	±	1.59186	63.7058	±	2.3359
	(Z,Z)-7,11-Heptacosadiene	7,11HD	790.04	±	23.0095	543.878	±	15.1035	132.63	±	5.85838	166.768	±	5.51882	169.439	±	3.00015	106.601	±	3.90663	81.1197	±	2.81712
	(Z,Z)-5,9-Heptacosadiene	5,9HD	53.9683	±	1.83868	64.2888	±	1.91082	681.582	±	27.9859	563.894	±	11.5545	542.391	±	17.0199	724.636	±	14.1054	666.566	±	21.1603
	2-Methylhexacosane	27-Br	272.052	±	9.95286	254.735	±	8.22915	420.381	±	15.7929	345.003	±	7.28027	342.173	±	16.7463	204.025	±	3.95666	208.851	±	23.1619
	(Z)-7-Heptacosene	7H	44.5532	±	5.40404	66.6679	±	5.99539	8.20969	±	0.982628	7.90939	±	0.950063	6.31922	±	0.345474	8.03859	±	0.482706	8.19358	±	1.05656
	(Z)-5-Heptacosene	5H	3.68826	±	0.36165	3.50259	±	0.367497	17.4909	±	1.04082	13.1427	±	0.949984	13.0808	±	0.585109	17.807	±	1.22428	20.2128	±	1.40603
	n-Heptacosane	n-C27	42.7738	±	3.01784	52.831	±	2.75984	25.0772	±	2.13353	27.4224	±	1.12072	33.5219	±	1.94595	40.771	±	2.96117	37.5985	±	3.45722
	2-Methylheptacosane	28-Br	11.3677	±	0.874937	8.83882	±	0.842576	6.90003	±	0.372287	6.40399	±	0.34875	6.27931	±	0.228366	5.87983	±	0.767886	7.54689	±	0.533027
	n-octacosane	n-C28	8.40429		1.10974	6.72072		1.5796	12.1255		0.91854	7.60228		0.493297	6.85337		0.413011	7.27395		0.306891	10.4088		0.508541
	(Z,Z)-7,11-Nonacosadiene	7,11ND	339.17	±	16.9522	237.135	±	18.9566	46.0909	±	6.23325	88.2713	±	4.50236	67.3714	±	7.27712	68.6681	±	4.6584	63.9481	±	4.43894
	2-Methyloctacosane	29-Br	92.447	±	5.20067	89.4088	±	3.43041	98.4038	±	8.05562	115.758	±	4.49086	100.155	±	5.94696	119.822	±	6.04374	136.508	±	6.94919
	n-Nonacosane	n-C29	6.02236	±	0.633717	13.2988	±	0.961132	9.24313	±	0.420275	8.30878	±	0.7234	8.3335	±	0.274668	9.37562	±	0.535768	10.775	±	0.575915
	2-Methyltriacontane	31-Br	11.8871	±	1.58038	20.4909	±	1.24045	17.0701	±	2.10284	20.7826	±	1.83744	15.2067	±	1.08726	14.0099	±	0.950295	18.0343	±	2.82501
	Sum of all cuticular hydrocarbons	∑CHs	2068.82		32.7849	2068.55		31.8429	1880.92		55.592	1964.05		14.4288	1954.52		24.4108	1791.72		40.4232	1686.66		37.6547
	Sum of all desaturated CHs	∑Desat	1444.77	±	22.213	1231.17	±	20.8902	1155.71	±	30.6326	1220.51	±	13.5114	1235.27	±	7.76517	1262.33	±	28.344	1130.13	±	23.1403
	Sum of all Branched CHs	∑Br	428.44	±	14.0869	434.593	±	9.00346	576.912	±	23.2322	535.621	±	8.67925	515.692	±	20.1788	368.074	±	9.29612	391.779	±	20.0476
	Sum of all Linear saturated CHs	∑Lin	195.611	±	6.21728	402.785	±	10.2033	148.294	±	4.08052	207.921	±	4.54955	203.56	±	6.88882	161.319	±	5.31984	164.756	±	5.09247
	7,11HD/5,9HD ratio (= HD-ratio)	7,11HD / 5,9HD	14.7256	±	0.264756	8.46918	±	0.0905971	0.196529	±	0.00956998	0.298136	±	0.0148511	0.315728	±	0.0127406	0.147023	±	0.00433537	0.121911	±	0.00279918
		Cuticular hydrocarbons (CHs) were measured in male and female flies (indicated in ng). We calculated the total absolute amount of Desaturated CHs (∑Desat; top plots) and Linear saturated CHs (∑Lin), and the 7/5-ratios.Data show the mean ± sem. N = 20.

## Sheet: Tab_S2
	Table S2: Copulation in F0 and F1 pairs of flies.
	MALE		Z30	Cs	Di/w	Z30 x	Cs x	Z30 x	Di/w x
	FEMALE					Cs	Z30	Di/w	Z30
	Z30		75/101	3/82	0/72	24/32	22/30	17/20	11/29
			0.74	0.04	0	0.75	0.73	0.85	0.38
	Cs		30/50	44/50	19/50	18/20	20/20	18/20	12/24
			0.6	0.88	0.38	0.9	1	0.9	0.5
	Di/w		50/59	55/56	38/50
			0.85	0.98	0.76
	Z30 x Cs		24/31	25/35
			0.77	0.71
	Cs x Z30		27/39	23/39
			0.69	0.59
	Z30 x Di/w		17/20	13/20
			0.85	0.65
	Di/w x Z30		30/36	30/36
			0.83	0.83
	Each behavioral observation lasted 2 hours. For each pair of flies, we show the number of copulating pairs/total number pairs tested. The copulation frequency rate is indicated (%) in bold characters. Z30 = Zimbabwe; Cs = Canton-S: Di2/w = Dijon2000 with the w1118 mutation. The F1 genotypes resulted of the cross between F0 females x F0 males.

## Sheet: Tab_S3
	Table S3: Fertility in pairs according to female and male strains and copulation status.
		MALES	Z30		Cs		Di/w
	FEMALES
	Z30	Copulation	42/50		1/1		0
		No copulation	6/15		17/45		9/72
		Total	48/65	0.74	18/46	0.39	9/72	0.12
	Cs	Copulation	28/30		43/44		17/19
		No copulation	20/20		4/6		28/31
		Total	48/50	0.96	47/50	0.94	45/50	0.9
	Di/w	Copulation	44/45		46/47		38/38
		No copulation	1/6		1/1		11/12
		Total	45/51	0.94	47/48	0.88	49/50	0.98
	Each copulation assay lasted 2 hours. For each pair of flies, we show the frequency of fertile pairs according to copulation status (Copulation = copulation within 2 hours; No copulation = copulation during the following 24 hours). The total fertility for each pair is shown in red (%).

## Sheet: Tab_S4
	Table S4: 7/5 ratios in BC1 flies (7T/5T in males; 7,11HD/5,9HD in females).
	Males	F1	F2		F3				Females	F1	F2		F3
	1	3.17895	10.7568		3.7459	3.66316			1	16	0.909502		1.01639	1.11864
	2	2.4424	16.0625		17.2195	7.01471			2	1.57862	2.16564		2.22464	3.48958
	3	2.97727	3.65049		3.90323	3.51136			3	1.05581	0.7875		2.64286	0.753304
	4		5.16	5.58333	8.16667	3.90217			4		1.18266	0.340426	0.716912	1.69333
	7	9.89091			8.3	15.5455			7	2.10582			1.73387
	8	4.03636	9.60417		7.46154	14.2368			8	0.347222	4.91045		0.975806	1.37143
	9	10.2609			14.7917	13.5217			9				0.398374	0.753165
	10	6.89157			4.47826	7.26984			10	0.994737			1.47305	0.693662
	11	4.69072	2.25581		5.4875	9.44231			11		0.976974		1.01064	0.962766
	11 bis				2.85526	3.62016			11 bis		0.157895		0.203647	0.18894	0.164678
	12	1.39437	6.375	7.8	3.41379	3.5			12	1.73659	2.01796	1.23529	0.643836	6.22414
	13	2.77647	10		8.07895	8.53571			13	0.247449	1.29697		0.801047	0.756906
	14	4.36905	6		9.75862	14.3			14	0.759259	0.220588		2.01111	0.378571
	15	2.88148	3.71053		6.2037	5.38462			15	0.0758483	0.384988		1.3299	0.317881
	16	3.82738	3.62857		3.92593	7.24			16	0.85533	0.127367		1.93056	3.74528
	18	19	18.3243		19.92	16.4474			18	19.4286	1.03704	1.77165	1.28125	2.38346
	19	1.57317			15.8182	13.8857			19	0.931727			0.100775	3.66667
	22	13.1379			16.125	15.125			22	46.3333			3.26667	20.3333
	23	3.64844			10.1852	7.57756			23	0.305882			6.48485	3.82
	25	7.01429			11.4516	6.01923			25	0.272138			1.42647	20.3333
	26	8.07018	4.20588		14.6667	8.27273			26	1.73649	0.883333		1.14685	2.15663
	The value of the ratio is indicated for each genotype. For color code, please refer to Figure 2.

## Sheet: Tab_S5
	Table S5: Copulation frequency rate in pairs involving a ZW1 male with a Cs or a Z30 female (during two hours).
		Female	Cs	Z30
		Male
		Z1	43.3	0
		Z2	70	0
		Z3	50	0
		Z4	33.3	0
		Z8	50	0
		Z10	23.3	0
		Z11	46.7	0
		Z12	9.8	0
		Z13	47.5	0
		Z14	50	0
		Z15	40	0
		Z16	16.7	0
		Z18	60	0
		Z26	40	0
		CS	83.3	0
		Z30	74.6	58.6
	N=30 for all ZW x Cs pairs, except for ZW4, ZW13, ZW18 (60), ZW12 (61); n=20 for all ZW x Z30 pairs;n=174 (Cs x Cs); n=406 (Z30 x Z30); n=152 (Z30 x Cs); n=59 (Cs x Z30).

## Sheet: Tab_S6
	Table S7: 7/5 ratios in BC2 flies (7T/5T in males; 7,11HD/5,9HD in females).
	Males	F1			F2		F3		F2 x Z30		Females	F1			F2		F3		F2 x Z30
	1A	6.18182	4.75		8.24096		5.41176	6.13636	1.31628		1A	1.31579	0.368644		1.93421	0.700893	0.20438	0.368771	0.172638
	1B	4.95062			10.597		4.64912	12.3158	1.5625		1B				0.569767	3.02326	0.173302	0.316901	0.253644
	1C	1.59024	2.25658		6.82692		4.70833	10.1333	2.1982		1C				1.34615	2.72464	0.107784	0.625731	0.147826
	1D	6.43077	1.72561		7.44444		3.90625		5.16438		1D	0.230352			0.609375	3.01316	0.191601	0.471366	0.206478
	1E	2.80198	2.39231		6.88235		3.12821	3.91803	6.4375		1E	0.976351	1.19277		0.695312	1.37671	0.116279	0.426667	0.165217
	3A	2.85	5.88889		6.85714		6.58824		1.76471		3A	1.35211	1.7		0.420792	0.637681	0.119617	0.319328	0.216912
	3B	1.53297	3.31944		3.13125		3.68		4.7451		3B	0.292683	0.379032		0.542636		0.152542	0.283333	0.273006
	3C	2.89286	2.5		3.7907		11.9474		3.37179		3C						0.176904	0.329317	0.173375
	3D	4.27273	4.10448		2.83459	7.17778	5.68		3.51948		3D				1.13287		0.129176	0.514019	0.168966
	3E	2.81915	2.80682		4.05556	10.1667	4.02128		2.08387		3E	0.776062	0.277778		1.35398		0.205607	0.382609	0.169675
	12A	25.6364	13.08								12A	0.341121	0.336957
	12B	3.58228	15.2632								12B	0.25256
	12C	2.4321	2.40678								12C	0.310127	1.21986
	12D	12.1622	3.68								12D	0.725118	0.796954	0.513699
	12E	3.0087	3.72727								12E
	B1A	10.6486	10.3611								B1A
	B1B	4.37681	4.74576								B1B	0.4
	B1C	1.42623	4.06931								B1C	0.961373	1.91824
	B1D	2.43564	2.65041								B1D
	B1E	4.17722	2.92029								B1E
	B3A	3.54106	1.99444	5.31646	4.94366		4.93939		3		B3A	0.290837			2.36765		0.211886	0.390805	0.290456
	B3B	10.1765	1.2585		4.325		4.32258		3.07955		B3B	0.464455			1.38983		0.154255	0.418033	0.271318
	B3C	1.57047	4.2043		15.625		5.33333		2.64773		B3C	1.33333	0.386792		0.528302		0.135307	0.303249	0.283333
	B3D	1.22083	8.57692	3.76699	5.64615		10.9091		1.72308		B3D	0.589474	2.59		1.98701		0.192683	0.270042	0.157343
	B3E	2.50467	4.19643		7.88372		3.65753		2.2234		B3E	2.72165	0.289037		0.360169		0.202128	0.404545	0.235521
	B12A	2.1978	1.79412								B12A
	B12B	5.66912	3.44118								B12B	0.754011	0.467742
	B12C	2.59854	1.66667								B12C	0.375635	0.418079
	B12D	1.65878	2.20588								B12D	0.359281	0.456311
	B12E	3.11029	1.74359								B12E	0.55914	0.30659	0.36
	The value of the ratio is indicated for each genotype. For color code, please refer to Figure 2.

## Sheet: Tab_S7
	Table S6. Mating copulation performance in ZW-BC2 flies paired with F0 flies.
		ZW x Cs									Z30 x ZW
	BC2 Lines	F1				F2					F2				F3
		(n)	Latency (min)	Duration (min)	%	(n)	Latency (min)	Duration (min)	%		(n)	Latency (min)	Duration (min)	%	(n)	Latency (min)	Duration (min)	%
	1 A	19	21	35	36.8	20	28	47	35		11	53	68	36.4	12	41	60	25
	1 B	6	16	31	83.3	18	23	40	50		12			0	16	54.4	79	31.25
	1 C	12	20	38	58.3	19	23	40	42.1		11	59	73	18.2	12	67.5	85.75	33.3333
	1 D	15	34	50	13.3	18	9	27	61.1		12	41	52	8.3	12	30	47.75	33.3333
	1 E	15	15	32	60	22	21	37	54.5		10	87	105	10	12	47.6667	66.6667	25
	∑1A-E	67	21.2	37.2	44.8	97	20.8	38.2	48.5		56	60	74.5	14.3	64	48.1133	67.8333	29.7
	3 A	20	9	23	5	16	0	0	0		11	57	69	9.1	12	78.4	96.8	41.6667
	3 B	15	0	0	0	23	21	33	4.8		10	69	76	10	16	55.3333	73.2222	56.25
	3 C	16	0	0	0	20	13	55	5		9	68	85	56.6	17	53.7143	69.7143	41.1765
	3 D	15	0	0	0	18	6	20	11.1		11	60	79	36.4	16	51.3333	70.8333	37.5
	3 E	15	12	29	13.3	16	12	30	12.5		14	61	82	21.4	12	61.25	82	33.3333
	∑3A-E	81	4.2	10.4	3.7	93	10.4	27.6	6.2		55	63	78.2	25.4	73	60.0062	78.514	42.5
	Bis 3 A	16	0	0	0	16	3	20	6.3		12	36	45	8.3	16	50.6667	74	18.75
	Bis 3 B	15	0	0	0	16			0		0				16	52	59.5	12.5
	Bis 3 C	19	23	40	15.8	19	15	34	15.8		10	65	77	30	16	53.5	78.5	12.5
	Bis 3 D	21	12	22	4.8	22	27	47	31.8		11	73	108	9.1	14	67.5	88.8333	42.8571
	Bis 3 E	15	12	26	13.3	16	13	32	18.8		12	53	70	33.3	16	74.7143	98.1429	43.75
	∑Bis3A-E	86	9.4	17.6	7.0	88	14.5	33.25	15.9		45	56.75	75	20.0	78	59.6762	79.7952	25.6
	12 A	16	21	41	12.5
	12 B	15	12	31	20
	12 C	19	21	39	10.5
	12 D	20	19	37	35
	12 E	6	0	0	0
	∑12A-E	76	14.6	29.6	18.4
	Bis 1 A	16	12	29	25
	Bis 1 B	15	9	27	13.3
	Bis 1 C	17	29	45	29.4
	Bis 1 D	15	17	36	13.3
	Bis 1 E	15	32	48	33.3
	∑Bis1A-E	78	19.8	37	23.1
	Bis 12 A	11	12	29	9.1
	Bis 12 B	15	21	47	13.3
	Bis 12 C	15	30	51	6.7
	Bis 12 D	16	31	50	12.5
	Bis 12 E	15	12	31	6.7
	∑Bis12A-E	72	21.2	41.6	9.7
	We tested ZW females at F1 and F2 generations with Cs males. Z30 females were tested with ZW males at F2 and F3 generations. For each sub-line, we show the mean latency and end of copulation We also indicate the mating frequency after the two-hour period (%).Values indicated in red, below each subline series correspond to the mean for each series of sublines.

## Sheet: Tab_S8
	Table S8: 7/5 ratios in BC3 male flies (7T/5T).
	Males	F1		F2		F3										F4
	1AI	2.69828	3.36066	1.21429	1.38938	12.7143	0.24	6.42857	1.36646	1.61176	6.8	2.35849	7.29545	5	0.941935
	1AII	0.11	0.11	0.11	0.11	1.68571	2.07407	3.32258	1.38424	6.25	0.953704	1.23009	6.70909	1.33333	5.93333
	1AIII			1.34634	4.02083	0.868347	5.6087	3.97403	0.955882	2.98485						1.36232	1.24691	5.83333	5.76	1.49565	7.14815	1.48889	6.35714	1.27273	10.0625	11.6364	10.7
	1AIV	8.09804	4.36986	2.46919	2.86486
	1AV	7.4026	13.6216	3.50459	3.85345
	1AVI	2.84507	3.31746	4.61404	2.82407
	1AVII	1.91398	2.48295	3.73485	8.73846
	1BI	2.46269	2.88991	5.49412	5.88
	1BII	3.45205	2.32836	1.07619	1.22509	13.5	5.82857	1.10303	9.52	9.77778
	1BIII	1.19527		1.5098	1.35204	0.903226	1.01911	1.04	1.15625	1.30303	1.03226	0.960526	4.35294	1.20809	1.5	1.00826	1.33333	1.32143	0.777778	1.23684	4.93939	1.11392	1.3012	4.19444	1.1954	1.14118	1.13542	4.41667	1.22826	1.34694	1.57317	1.616	1.62963
	1CI	3.67857	4.7549	10.4483	10.3729
	1CII	12.2353		10.8148	12.2037
	1CIII	6.28814		2.35829	1.59539
	1CIV	4.06542		4.76984	4.92453
	1CV	4.12048	3.16667	3.48824	2.96685
	1CVI	2.49474		2.75	1.93525	1.22944	0.996416	1.75472	1.14778	1.33409						8	2.07246	1.41096	1.35714	1.64045	1.30986	1.09655	5.41667
	1DI	10.6818	10.6	7.50877	4.74667
	1DII	22.6316		12.94	13.0714
	1DIII	3.5679	35.5	1.34137	1.18456	1.13333	0.121951	1.19188	5.57447	1.19545	1.06098	1.14407	4.88136	1.1519
	1DIV	2.59504	3.83688	1.6553	1.33613	2.41243	1.36458	2.2043	1.44118	1.45588	1.42857	4.90741	1.2437	6.26667	2.47126	1.92647	0.244444	8.91667	9.6	8.48485	1.68852	10.1538	1.64545	1.96599	5.7541	1.49231	1.48168	1.41129	1.56277	2.27273	1.37805	7.7561	1.6358	8.78378	1.53333	1.89362	1.86139	7.46154	8.21951	7.17857	1.4717	1.60811	1.56911	1.625	1.6625	1.58883	8.85417	8.20833	8.05556
	1EI	1.8951	12.8913	3.36585	3.6962
	1EII	2.75926	1.86864	2.29008	1.63636	1.17347	2.44186	1.21583	1.58333	1.02941	1.17371	1.51235	4.31081	1.06122	6.06742	1.06202	6.68571	1.13287	1.36774	1.09677	1.25532	1.21212	1.17089	1.4	1.01439	1.50427	1.41844	0.931034	1.30252	1.52381	1	1.9292	1.85185	6.70732	1.37879	1.53012	1.95625	2.08556	1.9187	1.95745	5.51163	5.75	1.54386	1.98529	1.84932	1.81159
	3AI	4.5	2.55556	3.09735	4.34483
	3AII	11.7097	3.70787	1.93137	3.16822
	3AIII	1.65185	4.2987	1.48954	1.30435
	3AIV	3.02609	7.89831	1.14222	1.32749
	3AV	3.31405	12.9231	7.60417	5
	3BI	2.75862	1.79032	2.30769	3.375	1.90756	3.47368	7.625	7.13793	1.58974	0.97	1.94161	6.875	8.05263	6.40909
	3BII	80.75	10.6316	9.74074	9.74419
	3BIII					1.07547	1.08511									1.70968	2.2	1.44785	2.53521	4.65	1.47423	1.875	1.63218	1.50476	1.16842	1.03546	2.02985	3.64103	1.51724	1.61069	1.3	1.32353	1.47525	1.2803	1.09692	1.35802
	3BIV	2.01124	5.41509	3.01562
	3CI	4.42105	1.6686	3.48148	4.05263
	3CII	2.10638		2.2381	3.98824
	3CIII	67.1818		2.32484	21.0526
	3CIV	12.8636		2.58	4.08537
	3CV	83.5		5.88571	5.98485
	3DI	10.5192	0.282209	3.62609	2.44667
	3DII	25	4.87778	4.98148
	3DIII	4.62121	3.55215	3.69565	3.33962
	3EI	2.50427	2.23188	4.2625	12.2051
	3EII	26.6364	13.7857	12.5667	11.8529
	3EIII	1.59633	1.63704			6.7561	5.86047	1.17766	7.88636	5.53571
	3EIV	2.49138	16.0909	1.8	8.27273
	3EV	2.16327	1.76871	4.13287	2.57447	8.88235	1.18876	8.54839	6.21951	0.119565
	3EVI	2.75	3.32	5.13253	4.45
	B3AI	8.02083	2.03191	2.2906	0.277228
	B3AII	2.77222	2.77344	2.13198	1.93617	1.29032	5.125	0.58046	1.30968	3.63333
	B3AIII	8.88636	9.66667	3.21818	3.2439
	B3BI	1.58252	1.91935	3.04902	1.34483	10.1071	11.3636	9.13793	9.64	8.84375
	B3BII	8.24324	2.63934	3.06667	1.2953
	B3BIII	3.58537	11.96	2.7449	1.25764
	B3BIV	1.6625	5.73333	4.20896	2.2037
	B3BV	3.39773	2.47368	3.08081	3.77011
	B3BVI	14.6364	11.5526	12.3953	13.7
	B3CI	12.5714	2.34194	3.34454	6.69492
	B3DI	5.23913	2.91667	2.12871	3.99225
	B3DII					1.50909	3.71212	1.34127	1.74468	1.57303						3.67857	4.18519	7.46341	2.32292
	B3DIII	1.57516	1.73881	2.83333	1.41885	6.68421	6.375	7.86207	1.12353	7.82222
	B3DIV	27.4	10.5909	8.30303	9.12903
	B3EI	1.74209	2.71724	2.25688	3.76471	1.78488	1.35429	1.45614	9.71429	3.95522
	B3EII	38.6	10.6667	3.10219	3.01869
	B3EIII	17.5909	13.1818	1.42604	1.76761
	B3EIV	21.0588	13.0345	13.4643	12.6897
	B3EV	8.54545	5.50847	6.47826	8.75
	The value of the ratio is indicated for each genotype. For color code, please refer to Figure 2.
[truncated: 1 more columns]

## Sheet: Tab_S9
	Table S9: 7/5 ratios in BC3 female flies (7,11HD/5,9HD ).
	Females	F2								F3																						F4
	1AI	0.254642	0.162162	0.321429
	1AII	6.90909	0.681818	0.398964
	1AIII	0.317778								0.196796	0.135501	0.131707	4.84444	0.205674	0.231343	0.410256	0.252427	0.454874	0.210317	0.263889	0.430769	0.459302	10.9677	9.26667	0.475083
	1AIV
	1AV
	1AVI
	1AVII
	1BI
	1BII	0.630769	0.470032	0.527933	4.66667	0.518987
	1BIII	0.150838	0.186312	0.115681	0.15082	0.12782	0.13355			0.0983213	0.118644	0.125731	0.275072	0.134694	0.107143	0.150895	0.148387	0.115385	0.0845921	0.213376	0.106061	0.0879121	0.205543	0.122449	0.0897436	0.258741	0.322581	0.139159	0.20155	0.158416	0.178191	0.16609	0.125874	0.236364	0.151751	0.177914	0.260177	0.181034	0.123626	0.214634	0.156109	0.130332	0.130872	0.210938	0.175	0.149091	0.157459
	1CI
	1CII
	1CIII
	1CIV
	1CV
	1CVI	0.258787	0.151339	0.148877						0.103571	0.0434783	0.125498	0.0657534	0.082996	0.147632	0.0935961	0.120283	0.111111
	1DI
	1DII
	1DIII	0.141872	5.2766	0.134112
	1DIV	0.474936								0.3	5.19697	0.305785	0.142857	0.250774	0.449857	0.609155	0.287425	4.19481	0.335601	0.278689	0.349593	0.541353	0.349544	0.294521	0.284211	0.177632	0.259259	0.243119	0.377682	0.155709	0.262032
	1EI
	1EII									0.0788043	0.232198	0.12766	0.25	0.307292	0.292505	0.217252	0.335347	0.214797	0.175676	0.124138	0.342308	0.266917	0.11437
	3AI
	3AII
	3AIII
	3AIV
	3AV
	3BI	0.393235	0.0821429	12.4231	0.235816
	3BII
	3BIII	0.253968								0.224771	0.210526	0.181373	0.253012	0.152542	0.180851	0.237624																0.215686	0.138889	0.153689	0.113402	0.122807	0.118357	0.257447	0.114967	0.0938338	0.155496	0.198953
	3BIV
	3CI
	3CII
	3CIII
	3CIV
	3CV
	3DI
	3DII
	3DIII
	3EI
	3EII
	3EIII	0.159898	0.223301	0.87931	0.239295	0.226619	0.315789
	3EIV
	3EV	6.88571	0.227692
	3EVI
	B3AI
	B3AII
	B3AIII
	B3BI	0.364829	8.18333	0.32334	0.334038	0.437008	8.59574	9.375	0.364829
	B3BII
	B3BIII
	B3BIV
	B3BV
	B3BVI
	B3CI
	B3DI
	B3DII	0.459941								0.208333	0.64557	0.270677	0.172485	0.189066
	B3DIII
	B3DIV
	B3EI	7.02326	0.361775	7.18421	0.414938	6.25
	B3EII
	B3EIII
	B3EIV
	B3EV
	bis 3 A III
	The value of the ratio is indicated for each genotype. For color code, please refer to Figure 2.

## Sheet: Tab_S10
	Table S10. Mating performance in ZW-BC3 flies paired with F0 flies.
					n	Copulations
		ZW-BC3	Female	Male	n	1 hour (%)	2 hours (%)
		Parental	Di/w	Cs	31	94	94
			Z30	Cs	42	0	2
		F1	1B-III	Cs	71	0	0
			1C-IV	Cs	40	37	42
			1D-III	Cs	38	34	39
			1D-IV	Cs	47	70	74
			1E-II	Cs	39	22	25
			3B-III	Cs	37	0	0
			Z30	1B-III	40	17	52
			Z30	1C-IV	31	0	0
			Z30	1D-III	27	0	7
			Z30	1D-IV	30	3	7
			Z30	1E-II	25	0	0
			Z30	3B-III	37	14	30
		F2	1B-III	Cs	40	0	0
			3B-III	Cs	38	0	0
			1B-III	Z30	40	47	62
			3B-III	Z30	30	67	77
			1B-III	1B-III	48	0	10
			3B-III	3B-III	55	18	36
			1B-III	3B-III	14	0	7
			3B-III	1B-III	8	12	37
	We tested ZW females at F1 and F2 generations with Cs and Z30 males, and also Z30 females with ZW males and ZW females with Z30 males, both at F1 generation. For each cross, we show the copulation frequency after one and two hours.

[truncated: 4 more sheets: Tab_S11, Tab_S12, Tab_S13, Tab_S14]
